# Supplementary material for: Novel fluorinated polyurethane decorated electrospun silica nanofibrous membranes exhibiting robust waterproof and breathable performances
Source: Royal Society of Chemistry journal article supplement (doi:10.1039/c3ra23326j), 2013-01-01
Supplement: c3ra23326j.pdf [file c3ra23326j.pdf]

Electrical Supplementary Information for

**Novel fluorinated polyurethane decorated electrospun silica  
nanofibrous membranes exhibiting the robust waterproof and  
breathable performances**

Xue Mao,<sup>ab</sup> Yuecheng Chen,<sup>ab</sup> Yang Si,<sup>ab</sup> Yang Li,<sup>ab</sup> Huigao Wan,<sup>ab</sup> Jianyong Yu,<sup>b</sup> Gang Sun<sup>b</sup>  
and Bin Ding<sup>\*abc</sup>

<sup>a</sup> State Key Laboratory for Modification of Chemical Fibers and Polymer Materials, College of  
Materials Science and Engineering, Donghua University, Shanghai 201620, China

<sup>b</sup> Nanomaterials Research Center, Modern Textile Institute, Donghua University, Shanghai  
200051, China

<sup>c</sup> State Environmental Protection Engineering Center for Pollution Treatment and Control in  
Textile Industry, Donghua University, Shanghai 201620, China

\* Corresponding author. E-mail: binding@dhu.edu.cn; Phone: +86-21-62378202; Fax:  
+86-21-62378202

## Functional group affirmation of pure and fluorinated polyurethane modified silica nanofibrous membranes

To check the role of chemical wettability imparted by fluorinated polyurethane (FPU) to the silica nanofibrous (SNF) membranes, a Fourier transform infrared (FT-IR) spectroscopic analysis was performed. Fig. S1† shows the comparative FT-IR spectra of SNF1 and SNF1/FPU1 membranes. The Si–O–Si specific for relevant membranes has given their absorption peak at 1147 and 811  $\text{cm}^{-1}$ , and the peak at 1064 and 455  $\text{cm}^{-1}$  was assigned to the Si–OH.<sup>1,2</sup> The typical absorption features for FPU were found at 1596  $\text{cm}^{-1}$  ( $-\text{CF}_3$ ), 1311  $\text{cm}^{-1}$  ( $-\text{N}-\text{H}$ ), 647  $\text{cm}^{-1}$  ( $\text{C}-\text{C}-\text{C}$ ), and 555  $\text{cm}^{-1}$  ( $\text{C}-\text{C}=\text{O}$ ), respectively.<sup>3</sup> The C–O–C specific for FPU has given their absorption band around 3311 and 1708  $\text{cm}^{-1}$ .<sup>4</sup> The stretching vibrations for aromatic ring and deformation vibration for  $-\text{CH}_2-$  appeared at 1533, 1411, 2933 and 2854  $\text{cm}^{-1}$ , respectively, which indicates the existence of FPU in the relevant composite membranes.<sup>4</sup>

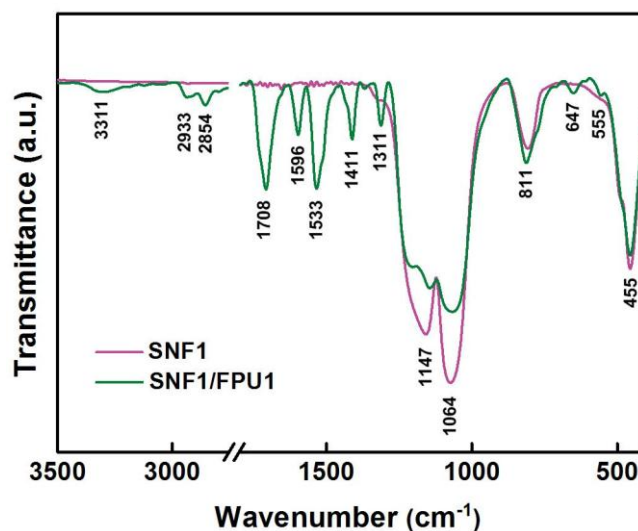

**Fig. S1.** FT-IR spectra of (a) SNF1 and (b) SNF1/FPU1 membranes.

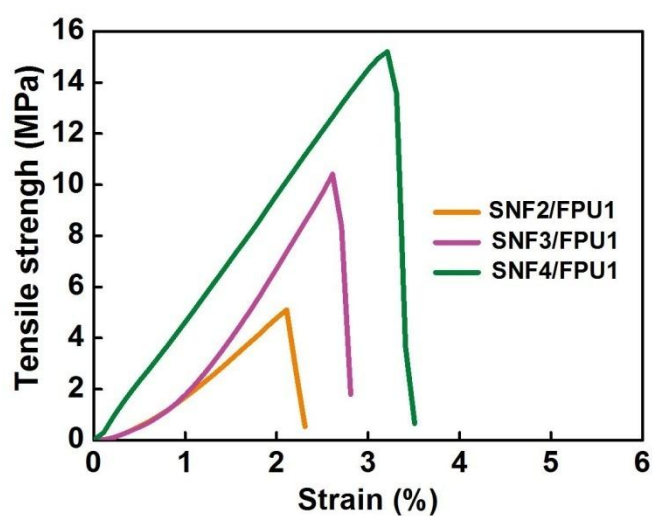

**Fig. S2.** Stress-strain curves of SNF2/FPU1, SNF3/FPU1, and SNF4/FPU1 membranes.

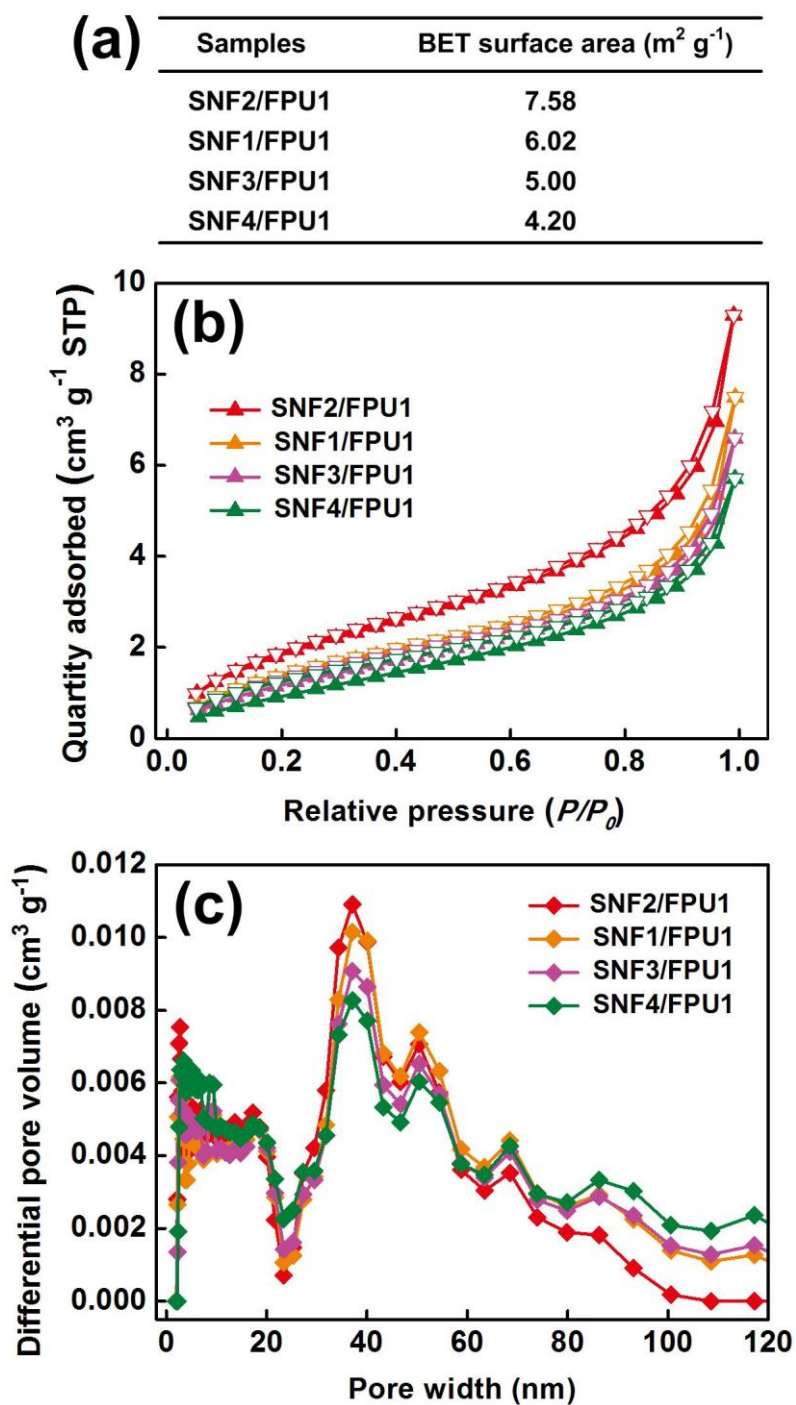

**Fig. S3.** (a) BET surface areas of SNF1/FPU1, SNF2/FPU1, SNF3/FPU1, and SNF4/FPU1 membranes. (b) Nitrogen physisorption isotherms of relevant membranes. (c) The differential pore volume as a function of pore width.

## REFERENCES

- 1 T. Nakagawa and Soga, M. *J Non-Cryst Solids*, 1999, **260**, 167-174.

- 2 M. Guo, B. Ding, X. Li, X. Wang, J. Yu and M. Wang, *J. Phys. Chem. C*, 2009, **114**, 916-921.
- 3 B. Ding, E. Kimura, T. Sato, S. Fujita and S. Shiratori, *Polymer*, 2004, **45**, 1895-1902.
- 4 J. Wang, A. Raza, Y. Si, L. Cui, J. Ge, B. Ding and J. Yu, *Nanoscale*, 2012, **4**, 7549-7556.
